# Supplementary material for: Electricity generation from carbon dioxide adsorption by spatially nanoconfined ion separation
Source: PubMed Central journal article supplement (PMC10965935; doi:10.1038/s41467-024-47040-x), 2024-03-26
Supplement: 41467_2024_47040_MOESM3_ESM.pdf [file 41467_2024_47040_MOESM3_ESM.pdf]

## **Description of Additional Supplementary Files**

### **File Name: Supplementary Movie 1**

**Description:** The movie demonstrates that electricity harvested from CO<sub>2</sub> adsorption reached 5V through the series and parallel connection of multiple generators, which is then used to power a light-emitting diode for several cycles.
